# Supplementary material for: Isotopic evidence for alteration of nitrous oxide emissions and producing pathways' contribution under nitrifying conditions
Source: Copernicus journal article supplement (doi:10.5194/bg-17-979-2020), 2020-02-24
Supplement: Supplementary file 1 [file bg-17-979-2020-supplement.pdf]

Supplement of Biogeosciences, 17, 979–993, 2020  
<https://doi.org/10.5194/bg-17-979-2020-supplement>  
© Author(s) 2020. This work is distributed under  
the Creative Commons Attribution 4.0 License.

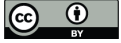

*Supplement of*

## **Isotopic evidence for alteration of nitrous oxide emissions and producing pathways' contribution under nitrifying conditions**

**Guillaume Humbert et al.**

*Correspondence to:* Guillaume Humbert (g.humbert86@gmail.com)

The copyright of individual parts of the supplement might differ from the CC BY 4.0 License.

1 **Supplementary material description**

2 Six pages of supplementary material containing two tables and three figures.

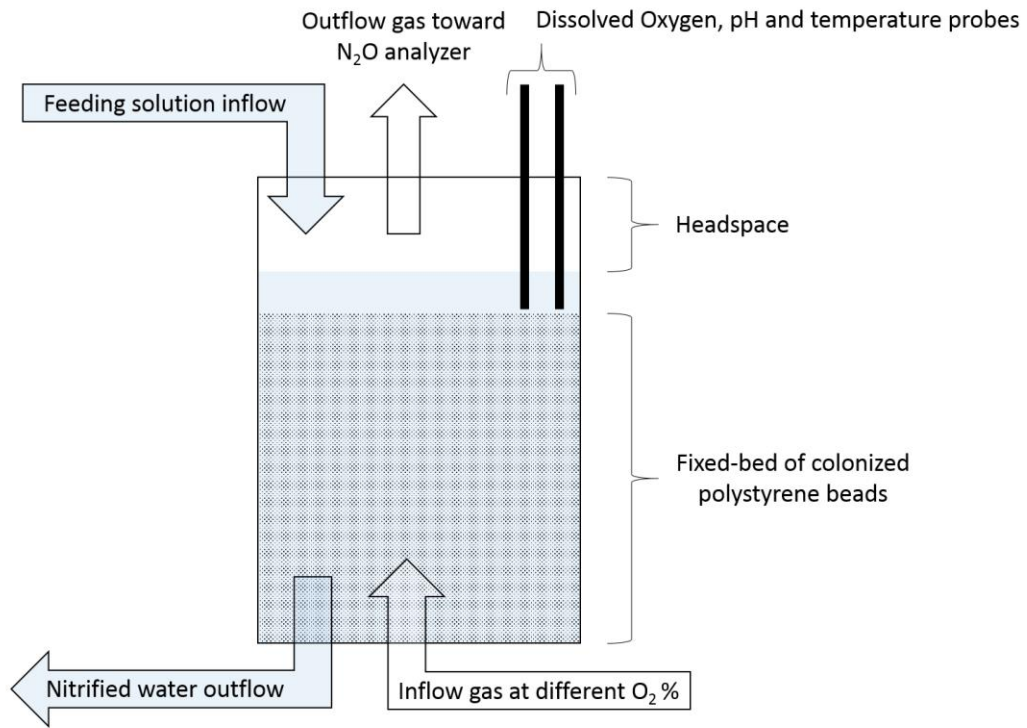

**Figure S1. Schematic overview of the nitrifying reactor used in this study. Note that solution was down-flowing, while air was up-flowing.**

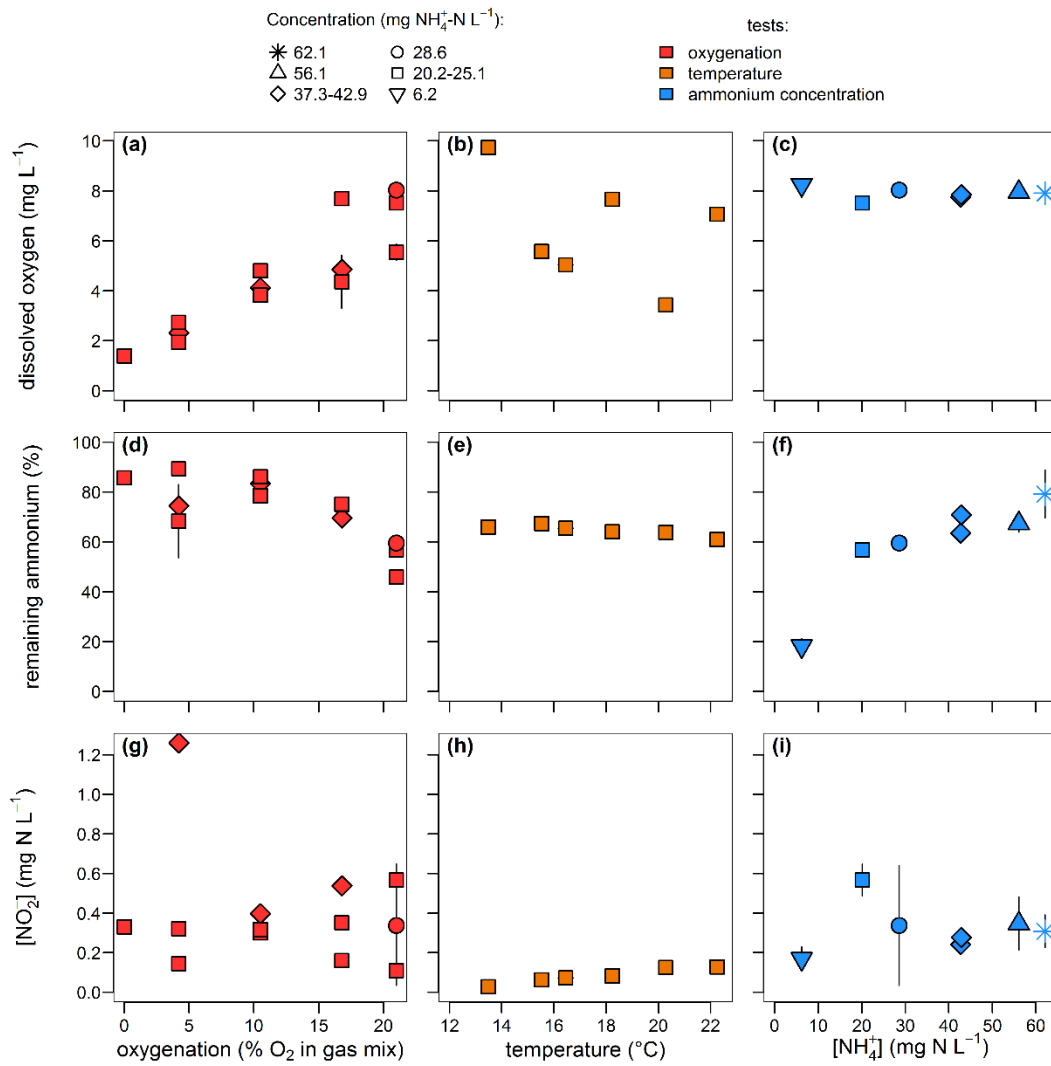

**Figure S2. Effect of oxygenation, temperature and ammonium concentration on (a-c) dissolved oxygen concentration, (d-f) the remaining ammonium, and (g-i) the nitrite concentration.**

4

5

6 **Table S1. Inflow and outflow ammonium, nitrite and nitrate concentrations measured during the ammonium**  
 7 **concentration tests.**

| $[\text{NH}_4^+] \text{ (mg N L}^{-1}\text{)}$ |           | $[\text{NO}_2^-] \text{ (mg N L}^{-1}\text{)}$ |          | $[\text{NO}_3^-] \text{ (mg N L}^{-1}\text{)}$ |           |
|------------------------------------------------|-----------|------------------------------------------------|----------|------------------------------------------------|-----------|
| inflow                                         | outflow   | inflow                                         | outflow  | inflow                                         | outflow   |
| 6.2 ±0.1                                       | 1.1 ±0.2  | 0                                              | 0.2 ±0.1 | 1.8                                            | 5.1 ±0.3  |
| 20.2 ±0.5                                      | 11.5 ±0.2 | 0.9 ±0.2                                       | 0.6 ±0.1 | 3.1 ±0.4                                       | 9.6 ±0.1  |
| 28.6 ±0.5                                      | 17 ±0.8   | 0                                              | 0.3 ±0.1 | 1.4                                            | 9.3 ±0.7  |
| 42.7 ±1.0                                      | 27.1 ±1.6 | 1.3                                            | 0.2 ±0.1 | 4.9 ±1.6                                       | 14 ±0     |
| 42.9                                           | 30.4      | 0.1                                            | 0.3      | 1.4                                            | 13.5      |
| 56.1 ±0.3                                      | 37.8 ±2   | 0.1 ±0.1                                       | 0.3 ±0   | 4.5 ±0.1                                       | 17.9 ±1.4 |
| 62.1 ±0.4                                      | 49.1 ±5.9 | 0                                              | 0.3 ±0.3 | 1.4                                            | 10 ±0.2   |

8

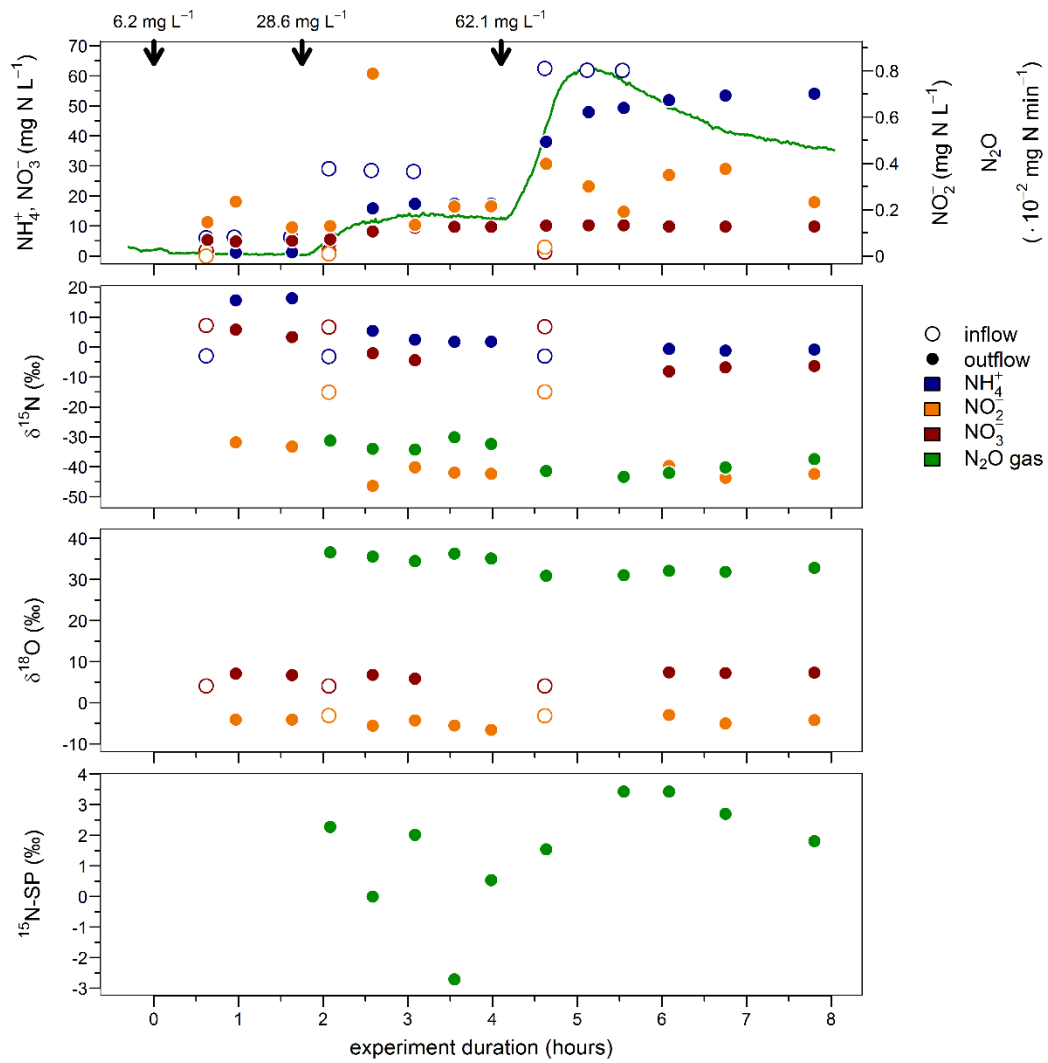

**Figure S3. Concentrations, and nitrogen and oxygen isotope ratios of ammonium ( $\text{NH}_4^+$ ), nitrite ( $\text{NO}_2^-$ ), nitrate ( $\text{NO}_3^-$ ) and nitrous oxide ( $\text{N}_2\text{O}$ ) measured during the increasing ammonium concentration experiment. Nitrogen isotopomer site-preference ( $^{15}\text{N-SP}$ ) was also calculated.**

9

10

11 Table S2. Inflow and outflow ammonium, nitrite and nitrate concentrations and nitrogen isotope ratios measured  
 12 during the ammonium concentration tests presented in Fig. S3. Average concentration and nitrogen isotope ratio were  
 13 calculated for the  $\text{NO}_x^-$  pool (i.e.  $\text{NO}_2^-$  and  $\text{NO}_3^-$ ). Note that the nitrogen isotope ratio of inflow samples was measured  
 14 only once in each experiment.

| $[\text{NH}_4^+]$          | $[\text{NO}_2^-]$ | $[\text{NO}_3^-]$ | $[\text{NO}_x^-]$ | $\delta^{15}\text{N-NH}_4^+$ | $\delta^{15}\text{N-NO}_2^-$ | $\delta^{15}\text{N-NO}_3^-$ | $\delta^{15}\text{N-NO}_x^-$ |
|----------------------------|-------------------|-------------------|-------------------|------------------------------|------------------------------|------------------------------|------------------------------|
| <i>mg N l<sup>-1</sup></i> |                   |                   |                   | <i>‰</i>                     |                              |                              |                              |
| inflow                     |                   |                   |                   | inflow                       |                              |                              |                              |
| 6.08                       | 0                 | 1.76              | 1.76              | -2.9                         | n.a.                         | 7.2                          | 7.2                          |
| 29.09                      | 0.01              | 1.38              | 1.39              | -3.1                         | -15.1                        | 6.7                          | 6.5                          |
| 62.51                      | 0.04              | 1.35              | 1.39              | -3                           | -14.9                        | 6.8                          | 6.2                          |
| outflow                    |                   |                   |                   | outflow                      |                              |                              |                              |
| $1.22 \pm 0.05$            | $0.18 \pm 0.06$   | $4.95 \pm 0.14$   | 5.13              | $16 \pm 0.4$                 | $-32.5 \pm 1$                | $4.6 \pm 1.4$                | 3.3                          |
| $17.02 \pm 0.72$           | $0.31 \pm 0.08$   | $9.26 \pm 0.66$   | 9.60              | $2.9 \pm 1.6$                | $-42.7 \pm 2.6$              | $-3.2 \pm 1.4$               | -4.6                         |
| $49.14 \pm 5.63$           | $0.34 \pm 0.28$   | $10.01 \pm 0.19$  | 10.32             | $-0.9 \pm 0.3$               | $-41.9 \pm 2$                | $-7.1 \pm 0.8$               | -8.1                         |

15
